# Supplementary material for: LHX2 promotes malignancy and inhibits autophagy via mTOR in osteosarcoma and is negatively regulated by miR-129-5p
Source: publisher site journal article supplement (doi:10.18632/aging.102427), 2019-11-13
Supplement: Supplementary file [file aging-v11i21-102427-supplementary-material-SD1.pdf]

SUPPLEMENTARY FIGURE

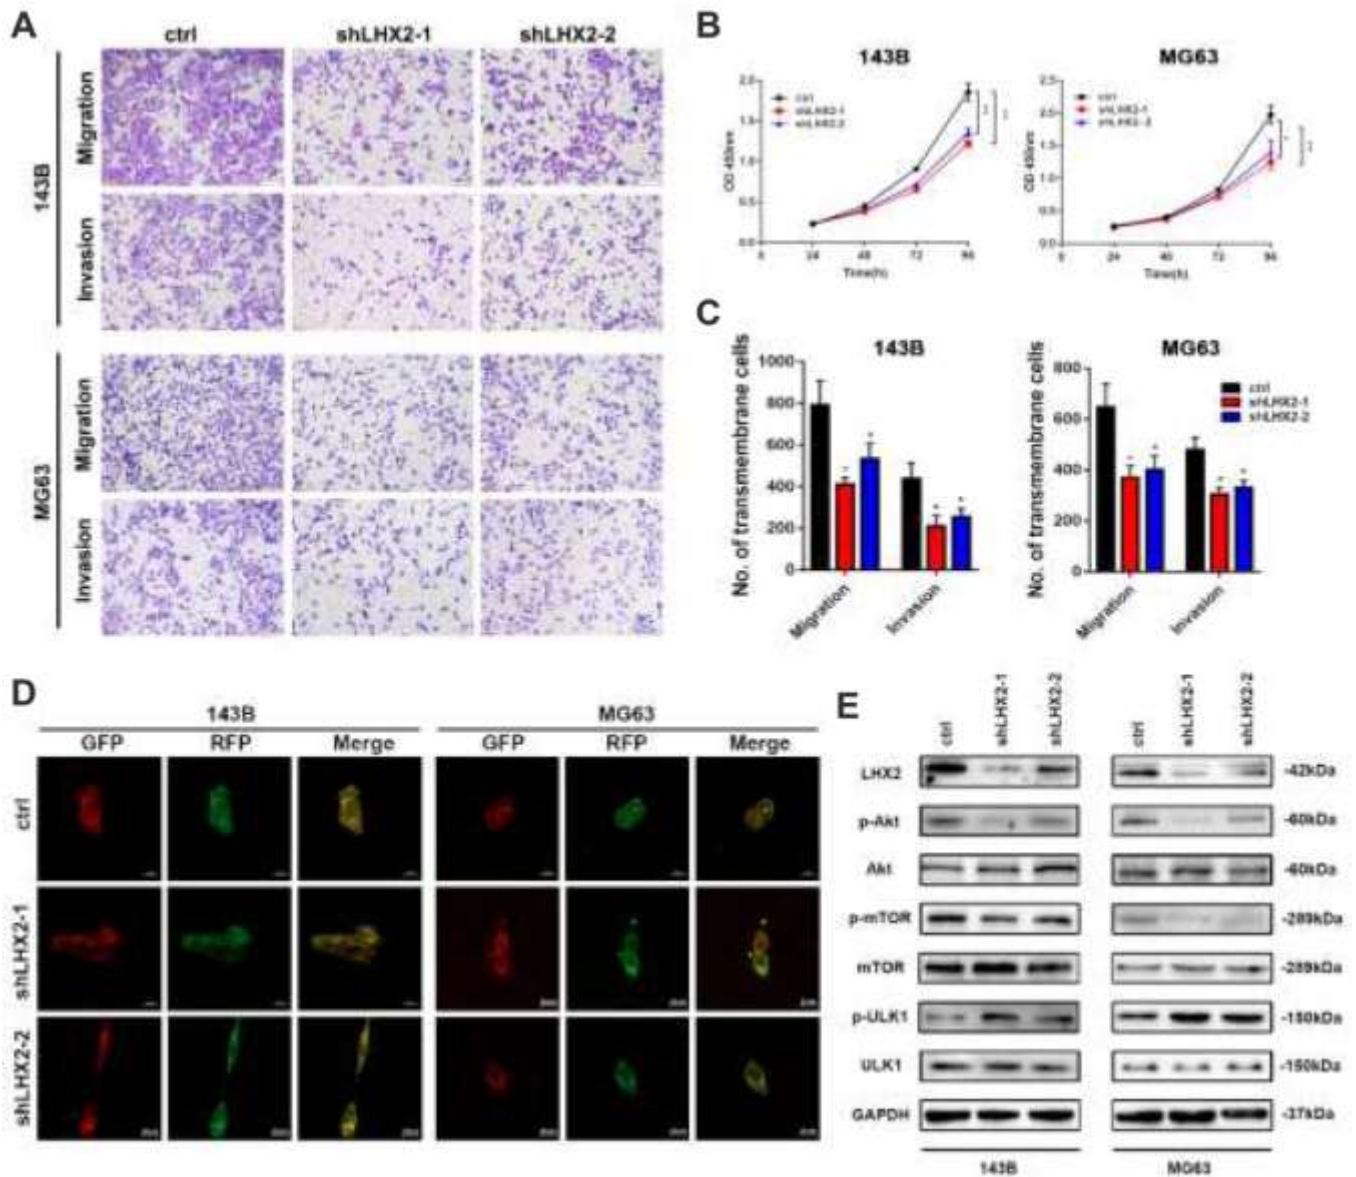

**Supplementary Figure 1. LHX2 silence inhibits the OS malignancy and enhances autophagy via mTOR.** (A–C) Transwell migration, invasion, and CCK8 assays were carried out to detect the malignancy in 143B and MG63 cells transfected with shLHX2-1, shLHX2-2 and control group. Significant differences were determined using unpaired Student’s t test. \*P < 0.05, \*\*P < 0.01. Scale bar: 100 μm. (D) 143B and MG63 cells transfected with shLHX2-1, shLHX2-2 and control group were scoped by confocal. Red puncta: autolysosomes; Yellow puncta: autophagosomes. Scale bar: 20 μm. (E) Western blots of LHX2, p-Akt (Ser473), Akt, p-mTOR (Ser2448), mTOR, p-ULK1 (Ser757), ULK1 in 143B and MG63 cells transfected with shLHX2-1, shLHX2-2 and control group. GAPDH was used as endogenous control.
