# Supplementary material for: LHX2 promotes malignancy and inhibits autophagy via mTOR in osteosarcoma and is negatively regulated by miR-129-5p
Source: Aging (Albany NY). 2019 Nov 13;11(21):9794–810. doi: 10.18632/aging.102427 (PMC6874432; doi:10.18632/aging.102427)
Supplement: Supplementary Table 1 [file aging-11-102427-s001.xls]

## Sheet: OS804c(100)
Detailed information of tissue array panel
No.	Age	Sex	Organ	Pathology diagnosis	TNM	Stage	Staining intensity(SI)	Cellular localization	Cells type
_pheochromocytoma_
A1	13	F	Bone	Osteosarcoma of left femur	T2N0M0 G2	IB	+	Cytoplasm	Tumor cells
A2	13	F	Bone	Osteosarcoma of left femur	T2N0M0 G2	IB	+	Cytoplasm	Tumor cells
A3	12	M	Bone	Osteosarcoma of left femur	T2N0M0 G3	IIB	++	Cytoplasm	Tumor cells
A4	12	M	Bone	Osteosarcoma of left femur	T2N0M0 G3	IIB	++	Cytoplasm	Tumor cells
A5	23	F	Bone	Osteosarcoma of left femur	T2N0M0 G3	IIB	++	Cytoplasm	Tumor cells
A6	23	F	Bone	Osteosarcoma of left femur	T2N0M0 G3	IIB	++	Cytoplasm	Tumor cells
A7	21	M	Bone	Osteosarcoma of left femur	T2N0M0 G2	IB	++	Cytoplasm	Tumor cells
A8	21	M	Bone	Osteosarcoma of left femur	T2N0M0 G2	IB	++	Cytoplasm	Tumor cells
A9	42	M	Bone	Osteosarcoma of left femur	T2N0M0 G3	IIB	++	Cytoplasm	Tumor cells
A10	42	M	Bone	Osteosarcoma of left femur	T2N0M0 G3	IIB	++	Cytoplasm	Tumor cells
B2	16	F	Bone	Osteosarcoma of left femur	T2N0M0 G3	IIB	++	Cytoplasm	Tumor cells
B3	15	F	Bone	Osteosarcoma of left femur	T2N0M0 G2	IB	+	Cytoplasm	Tumor cells
B4	15	F	Bone	Osteosarcoma of left femur	T2N0M0 G2	IB	+	Cytoplasm	Tumor cells
B5	35	M	Bone	Osteosarcoma of left femur	T2N0M0 G2	IB	+	Cytoplasm	Tumor cells
B6	35	M	Bone	Osteosarcoma of left femur	T2N0M0 G2	IB	+	Cytoplasm	Tumor cells
B7	64	M	Bone	Osteosarcoma of left femur	T2N0M0 G2	IB	++	Cytoplasm	Tumor cells
B8	64	M	Bone	Osteosarcoma of left femur	T2N0M0 G2	IB	++	Cytoplasm	Tumor cells
B9	29	M	Bone	Osteosarcoma of left femur	T1N0M0 G2	IA	++	Cytoplasm	Tumor cells
B10	29	M	Bone	Osteosarcoma of left femur	T1N0M0 G2	IA	++	Cytoplasm	Tumor cells
C1	30	M	Bone	Osteoblast type osteosarcoma of left femur	T2N0M0 G2	IB	-
C2	30	M	Bone	Osteoblast type osteosarcoma of left femur	T2N0M0 G2	IB	-
C3	51	M	Bone	Osteosarcoma of left femur	T2N0M0 G2	IB	+	Cytoplasm	Tumor cells
C4	51	M	Bone	Osteosarcoma of left femur	T2N0M0 G2	IB	+	Cytoplasm	Tumor cells
C5	11	M	Bone	Osteosarcoma of left femur	T2N0M0 G2	IIA	+++	Cytoplasm	Tumor cells
C6	11	M	Bone	Osteosarcoma of left femur	T2N0M0 G2	IIA	+++	Cytoplasm	Tumor cells
C7	47	F	Bone	Osteosarcoma of left femur	T2N0M0 G2	IB	++	Cytoplasm	Tumor cells
C8	47	F	Bone	Osteosarcoma of left femur	T2N0M0 G2	IB	++	Cytoplasm	Tumor cells
C9	47	M	Bone	Osteosarcoma of left femur	T2N0M0 G3	IIB	+	Cytoplasm	Tumor cells
C10	47	M	Bone	Osteosarcoma of left femur	T2N0M0 G3	IIB	+	Cytoplasm	Tumor cells
D1	16	F	Bone	Osteoblast type osteosarcoma of left femur	T2N0M0 G2	IB	-
D2	16	F	Bone	Osteoblast type osteosarcoma of left femur	T2N0M0 G2	IB	-
D3	12	F	Bone	Osteosarcoma of femur	T2N0M0 G3	IIB	++	Cytoplasm	Tumor cells
D4	12	F	Bone	Osteosarcoma of femur	T2N0M0 G3	IIB	++	Cytoplasm	Tumor cells
D5	16	M	Bone	Osteosarcoma of right femur	T2N0M0 G2	IB	-
D6	16	M	Bone	Osteosarcoma of right femur	T2N0M0 G2	IB	-
D7	16	M	Bone	Osteosarcoma of right femur	T2N0M0 G3	IIB	+	Cytoplasm	Tumor cells
D8	16	M	Bone	Osteosarcoma of right femur	T2N0M0 G3	IIB	+	Cytoplasm	Tumor cells
D9	37	F	Bone	Osteosarcoma of right femur	T1N0M0 G2	IA	+	Cytoplasm	Tumor cells
D10	37	F	Bone	Osteosarcoma of right femur	T1N0M0 G2	IA	+	Cytoplasm	Tumor cells
E1	14	M	Bone	Osteosarcoma of right femur	T2N0M0 G2	IB	+	Cytoplasm	Tumor cells
E2	14	M	Bone	Osteosarcoma of right femur	T2N0M0 G2	IB	+	Cytoplasm	Tumor cells
E3	14	F	Bone	Osteosarcoma of right femur	T2N0M0 G3	IIB	++	Cytoplasm	Tumor cells
E4	14	F	Bone	Osteosarcoma of right femur	T2N0M0 G3	IIB	++	Cytoplasm	Tumor cells
E5	32	F	Bone	Osteosarcoma of right femur	T2N0M0 G3	IIB	+	Cytoplasm	Tumor cells
E6	32	F	Bone	Osteosarcoma of right femur	T2N0M0 G3	IIB	+	Cytoplasm	Tumor cells
E7	46	M	Bone	Osteosarcoma of right femur	T2N0M0 G2	IB	++	Cytoplasm	Tumor cells
E8	46	M	Bone	Osteosarcoma of right femur	T2N0M0 G2	IB	++	Cytoplasm	Tumor cells
E9	16	M	Bone	Osteosarcoma of right femur	T2N0M0 G3	IIB	+	Cytoplasm	Tumor cells
E10	16	M	Bone	Osteosarcoma of right femur	T2N0M0 G3	IIB	+	Cytoplasm	Tumor cells
F1	17	M	Bone	Osteosarcoma of left tibia(blank)	T2N0M0 G2	IB	-
F2	17	M	Bone	Osteosarcoma of left tibia	T2N0M0 G2	IB	-
F3	17	M	Bone	Osteosarcoma of left tibia	T2N0M0 G2	IB	+	Cytoplasm	Tumor cells
F4	17	M	Bone	Osteosarcoma of left tibia	T2N0M0 G2	IB	+	Cytoplasm	Tumor cells
F5	14	F	Bone	Osteosarcoma of left tibia	T2N0M0 G3	IIB	++	Cytoplasm	Tumor cells
F6	14	F	Bone	Osteosarcoma of left tibia	T2N0M0 G3	IIB	++	Cytoplasm	Tumor cells
F7	38	M	Bone	Osteosarcoma of left tibia	T2N0M0 G3	IIB	+	Cytoplasm	Tumor cells
F8	38	M	Bone	Osteosarcoma of left tibia	T2N0M0 G3	IIB	+	Cytoplasm	Tumor cells
F9	20	F	Bone	Osteosarcoma of right tibia	T2N0M0 G3	IIB	+	Cytoplasm	Tumor cells
F10	20	F	Bone	Osteosarcoma of right tibia	T2N0M0 G3	IIB	+	Cytoplasm	Tumor cells
G1	60	M	Bone	Osteosarcoma of right femur	T2N0M0 G3	IIB	++	Cytoplasm	Tumor cells
G2	60	M	Bone	Osteosarcoma of right femur	T2N0M0 G3	IIB	++	Cytoplasm	Tumor cells
G3	31	M	Bone	Osteoblast type osteosarcoma of left humerus	T2N0M0 G3	IIB	+	Cytoplasm	Tumor cells
G4	31	M	Bone	Osteoblast type osteosarcoma of left humerus	T2N0M0 G3	IIB	+	Cytoplasm	Tumor cells
G5	18	M	Bone	Osteosarcoma of right humerus	T2N0M0 G2	IB	+	Cytoplasm	Tumor cells
G6	18	M	Bone	Osteosarcoma of right humerus	T2N0M0 G2	IB	+	Cytoplasm	Tumor cells
G7	32	F	Bone	Osteosarcoma of right humerus	T2N0M0 G2	IB	++	Cytoplasm	Tumor cells
G8	32	F	Bone	Osteosarcoma of right humerus	T2N0M0 G2	IB	++	Cytoplasm	Tumor cells
G9	41	F	Bone	Osteosarcoma of right humerus	T1N0M0 G2	IA	-
G10	41	F	Bone	Osteosarcoma of right humerus	T1N0M0 G2	IA	-
H1	30	M	Bone	Osteosarcoma of rib	T1N0M0 G2	IA	-
H2	30	M	Bone	Osteosarcoma of rib	T1N0M0 G2	IA	-
H3	32	M	Bone	Osteosarcoma of the left sixth rib	T1N0M0 G3	IIA	+	Cytoplasm	Tumor cells
H4	32	M	Bone	Osteosarcoma of the left sixth rib	T1N0M0 G3	IIA	+	Cytoplasm	Tumor cells
H5	33	M	Bone	Osteosarcoma of left upper jaw	T1N0M0 G2	IA	+	Cytoplasm	Tumor cells
H6	33	M	Bone	Osteosarcoma of left upper jaw	T1N0M0 G2	IA	+	Cytoplasm	Tumor cells
H7	15	M	Bone	Osteosarcoma of lower jaw	T2N1M0 G3	IVB	++	Cytoplasm	Tumor cells
H8	15	M	Bone	Osteosarcoma of lower jaw	T2N1M0 G3	IVB	++	Cytoplasm	Tumor cells
H9	51	M	Bone	Osteosarcoma of right fibula	T2N0M0 G3	IIB	+	Cytoplasm	Tumor cells
H10	51	M	Bone	Osteosarcoma of right fibula	T2N0M0 G3	IIB	+	Cytoplasm	Tumor cells
